# Supplementary material for: Promoting practical photodegradation application potential of a Bi2WO6-based step-scheme heterojunction under outdoor natural sunlight irradiation
Source: Royal Society of Chemistry journal article supplement (doi:10.1039/d2cy01567f), 2022-01-01
Supplement: d2cy01567f1.pdf [file d2cy01567f1.pdf]

Supporting Information

**Promoting practical photodegradation application potential of  
Bi<sub>2</sub>WO<sub>6</sub>-based step-scheme heterojunction under outdoor natural  
sunlight irradiation**

Yuanyuan Zhang <sup>a</sup>, Linxing Shi <sup>a\*</sup>, Xianggang Sun <sup>a</sup>, Liangsheng Duan <sup>a</sup>, Qile Li <sup>a</sup>,  
Zengguang Huang <sup>a</sup>, Ruiqiang Ding <sup>a</sup>, Xinxin Ban <sup>b</sup>, DongEn Zhang <sup>b</sup>

<sup>a</sup> School of Science, Jiangsu Ocean University, Lianyungang 222005, People's  
Republic of China

<sup>b</sup> Department of Chemical Engineering, Jiangsu Ocean University, Lianyungang  
222005, People's Republic of China

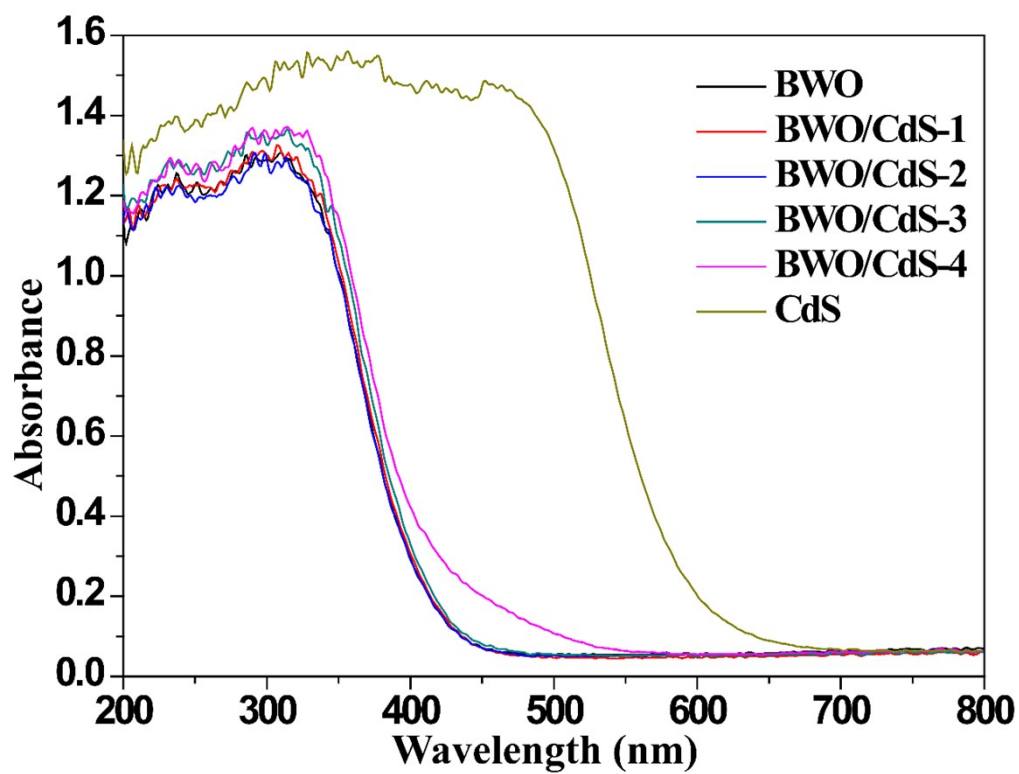

Fig. S1. UV-vis diffuse reflection spectra of samples.

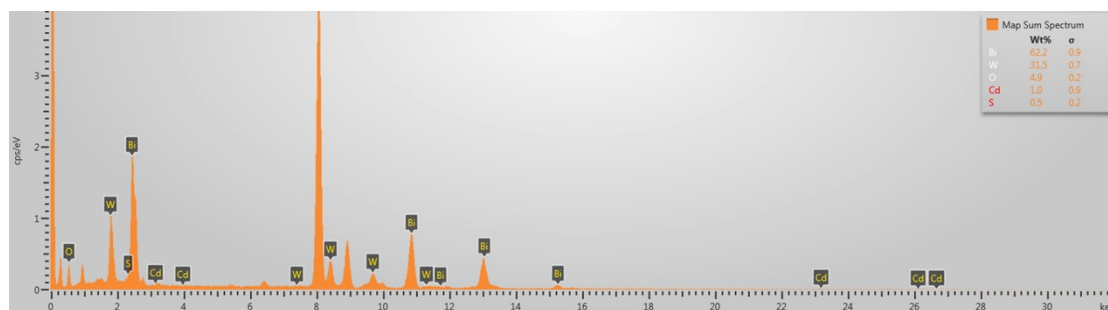

Fig. S2. EDS spectrum of BWO/CdS-2 composite.

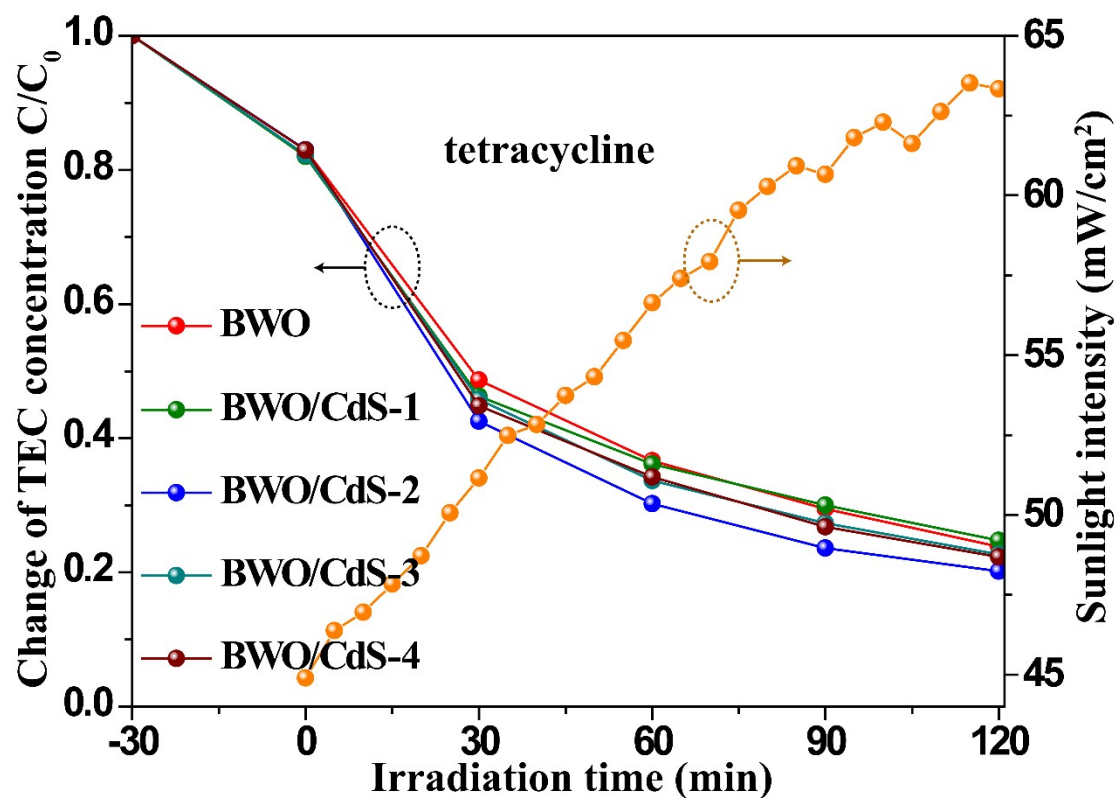

Fig. S3. TEC photocatalytic degradation over BWO composite with different CdS contents under natural sunlight irradiation and the variation of light power density over irradiation time.

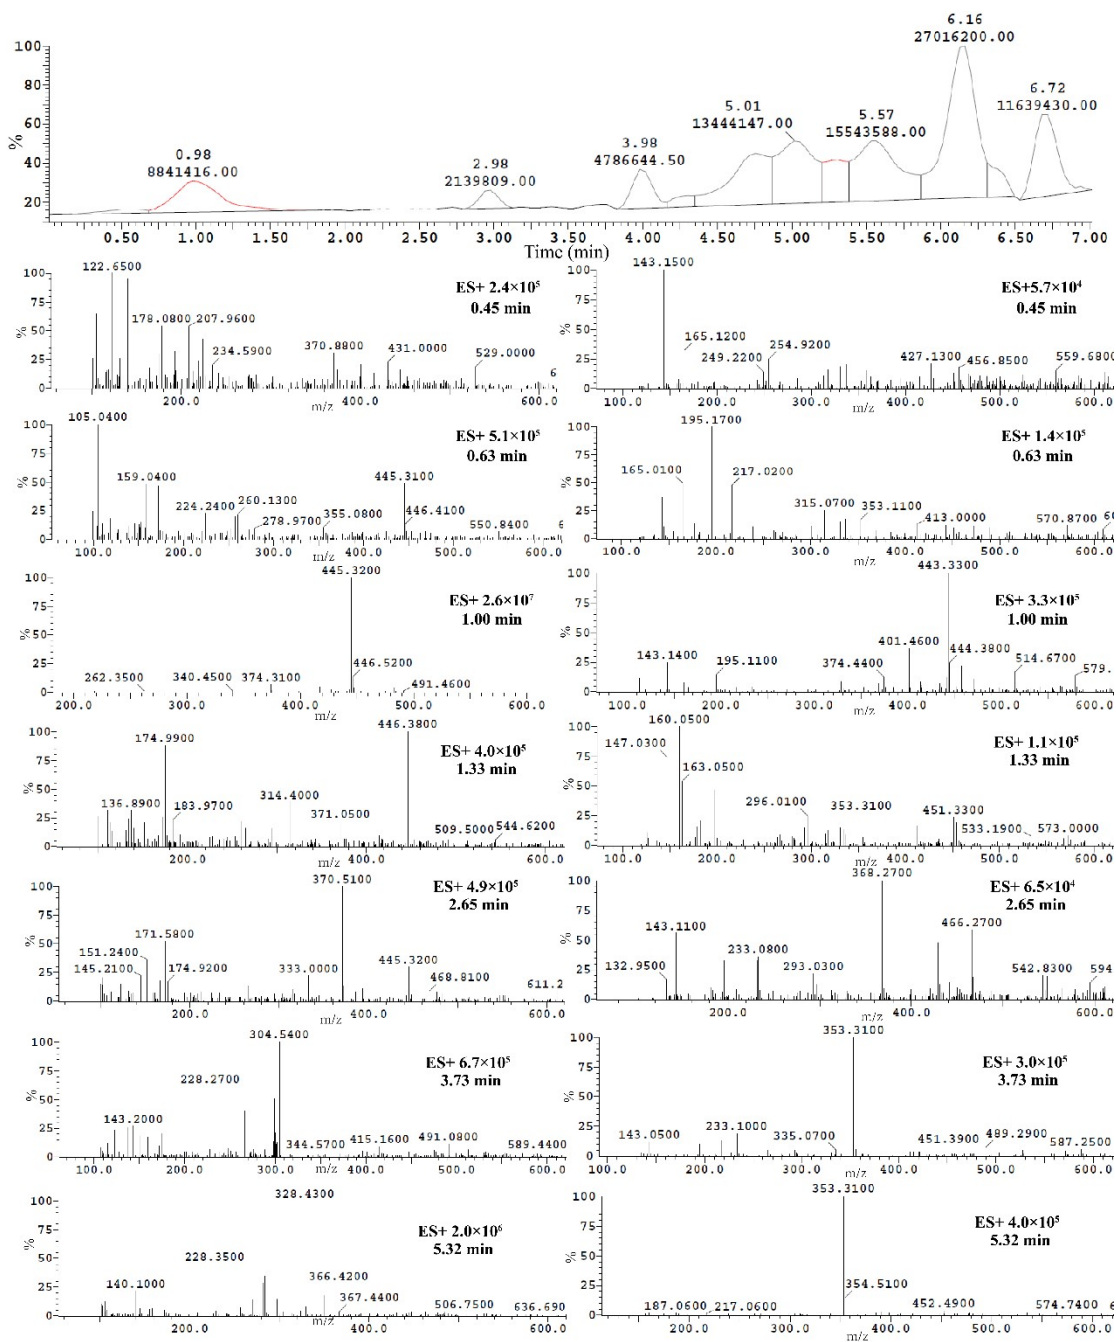

**Fig. S4.** Total HPLC-MS after the TEC photodegradation under sunlight irradiation for 30 min over BWO/CdS-2 and the corresponding intermediates analysis at different retention times of 0.45 min, 0.63 min, 1.00 min, 1.33 min, 2.65 min, 3.73 min, and 5.32 min.

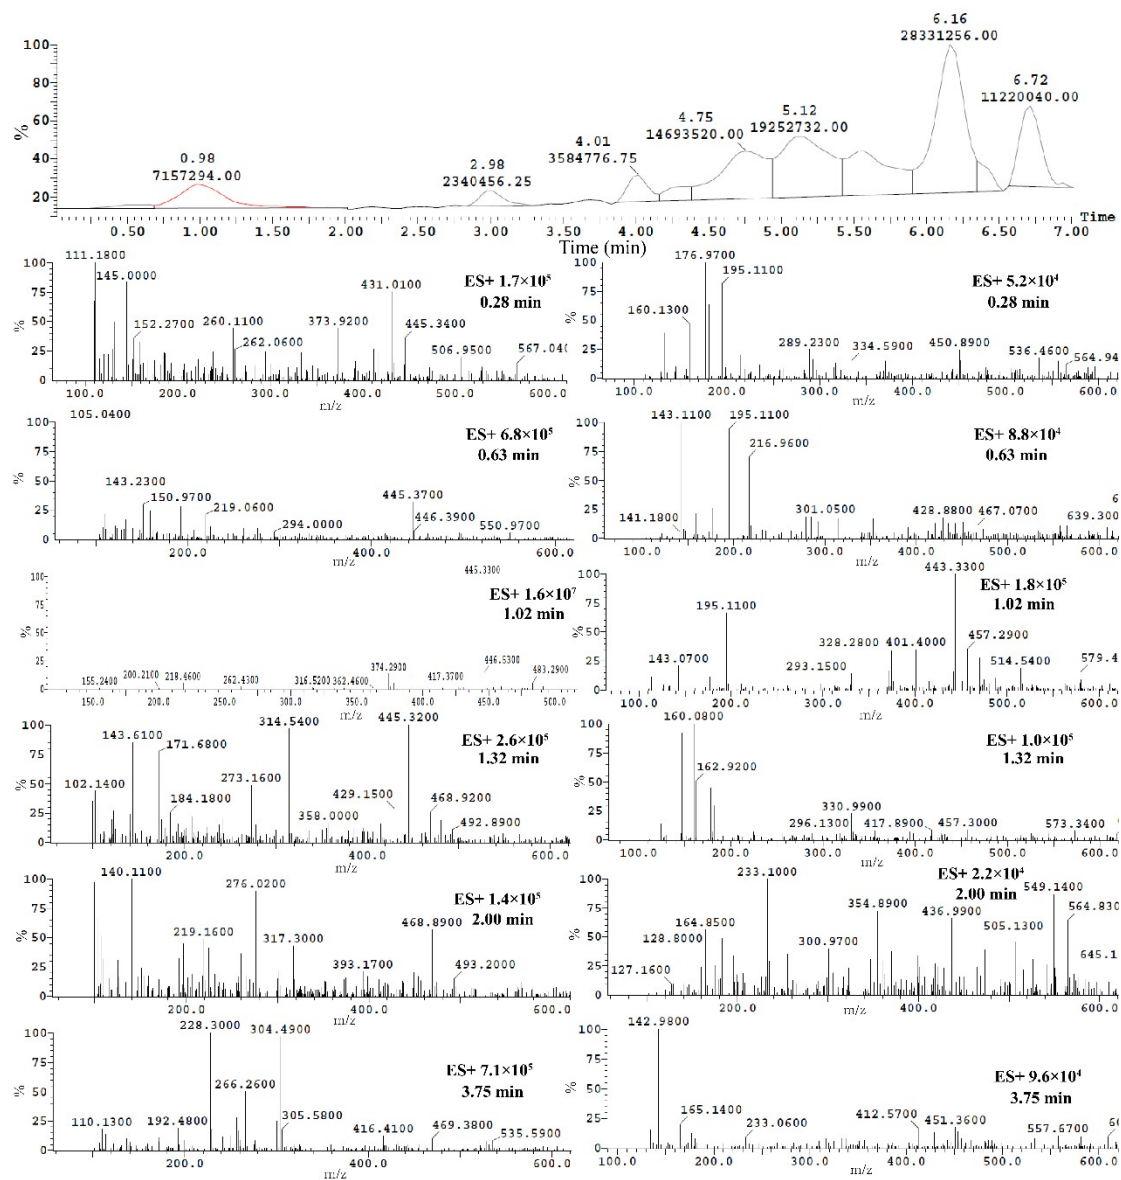

**Fig. S5.** Total HPLC-MS after the TEC photodegradation under sunlight irradiation for 60 min over BWO/CdS-2 and the corresponding intermediates analysis at different retention times of 0.28 min, 0.63 min, 1.02 min, 1.32 min, 2.00 min, and 3.75 min.

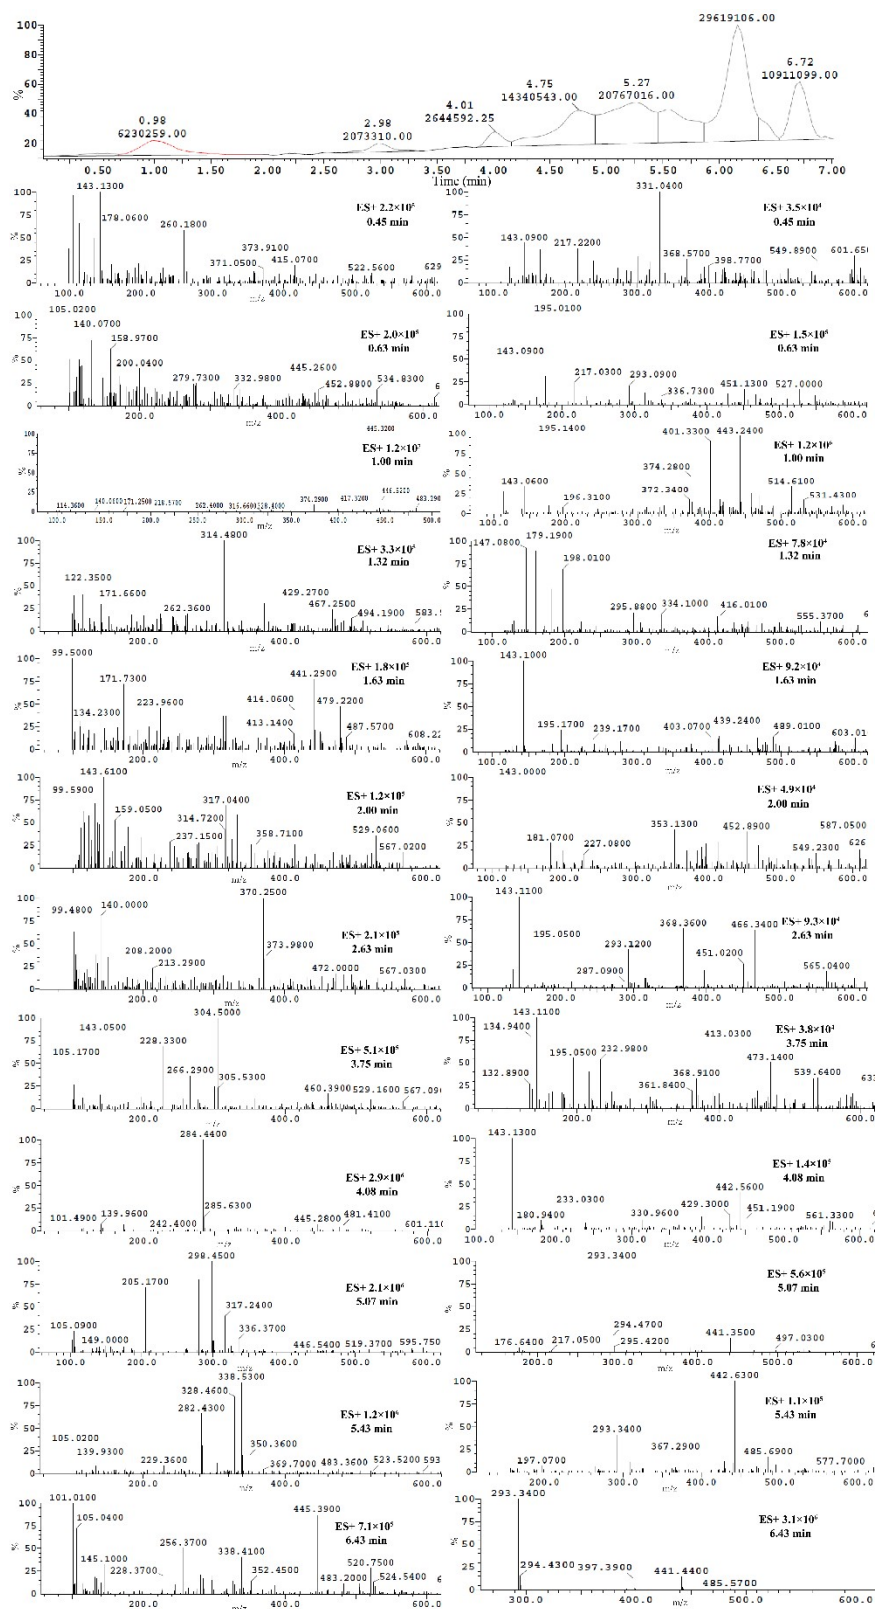

**Fig. S6.** Total HPLC-MS after the TEC photodegradation under sunlight irradiation for 90 min over BWO/CdS-2 and the corresponding intermediates analysis at different retention times of 0.45 min, 0.63 min, 1.00 min, 1.32 min, 1.63 min, 2.00 min, 2.63

min, 3.75 min, 4.08 min, 5.07 min, 5.43 min, and 6.43 min.

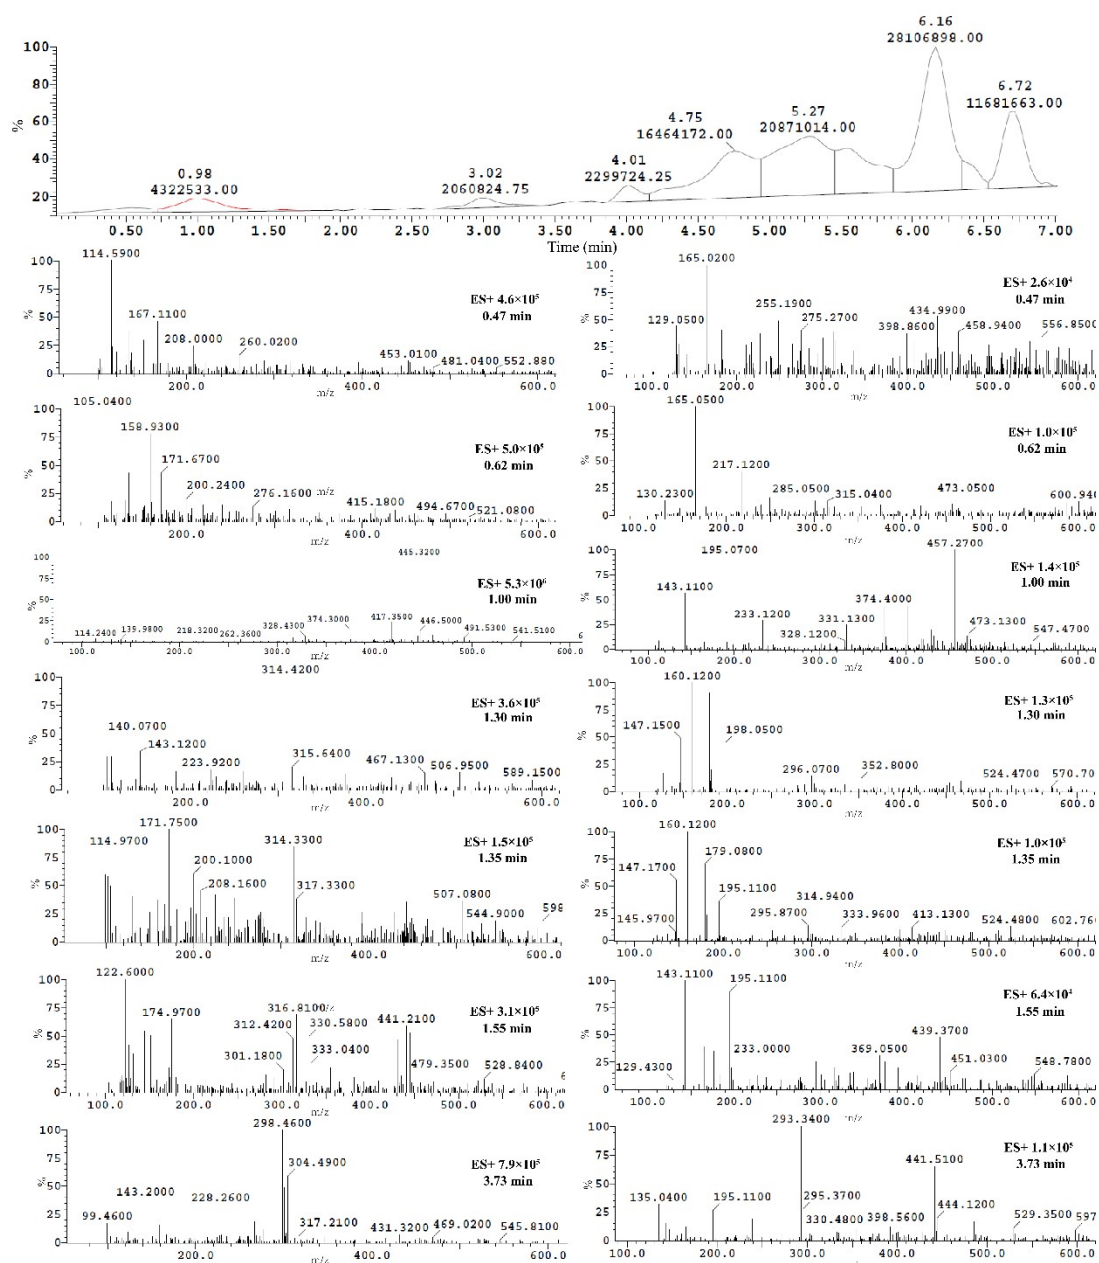

**Fig. S7.** Total HPLC-MS after the TEC photodegradation under sunlight irradiation for 120 min over BWO/CdS-2 and the corresponding intermediates analysis at different retention times of 0.47 min, 0.62 min, 1.00 min, 1.30 min, 1.35 min, 1.55 min, and 3.73 min.

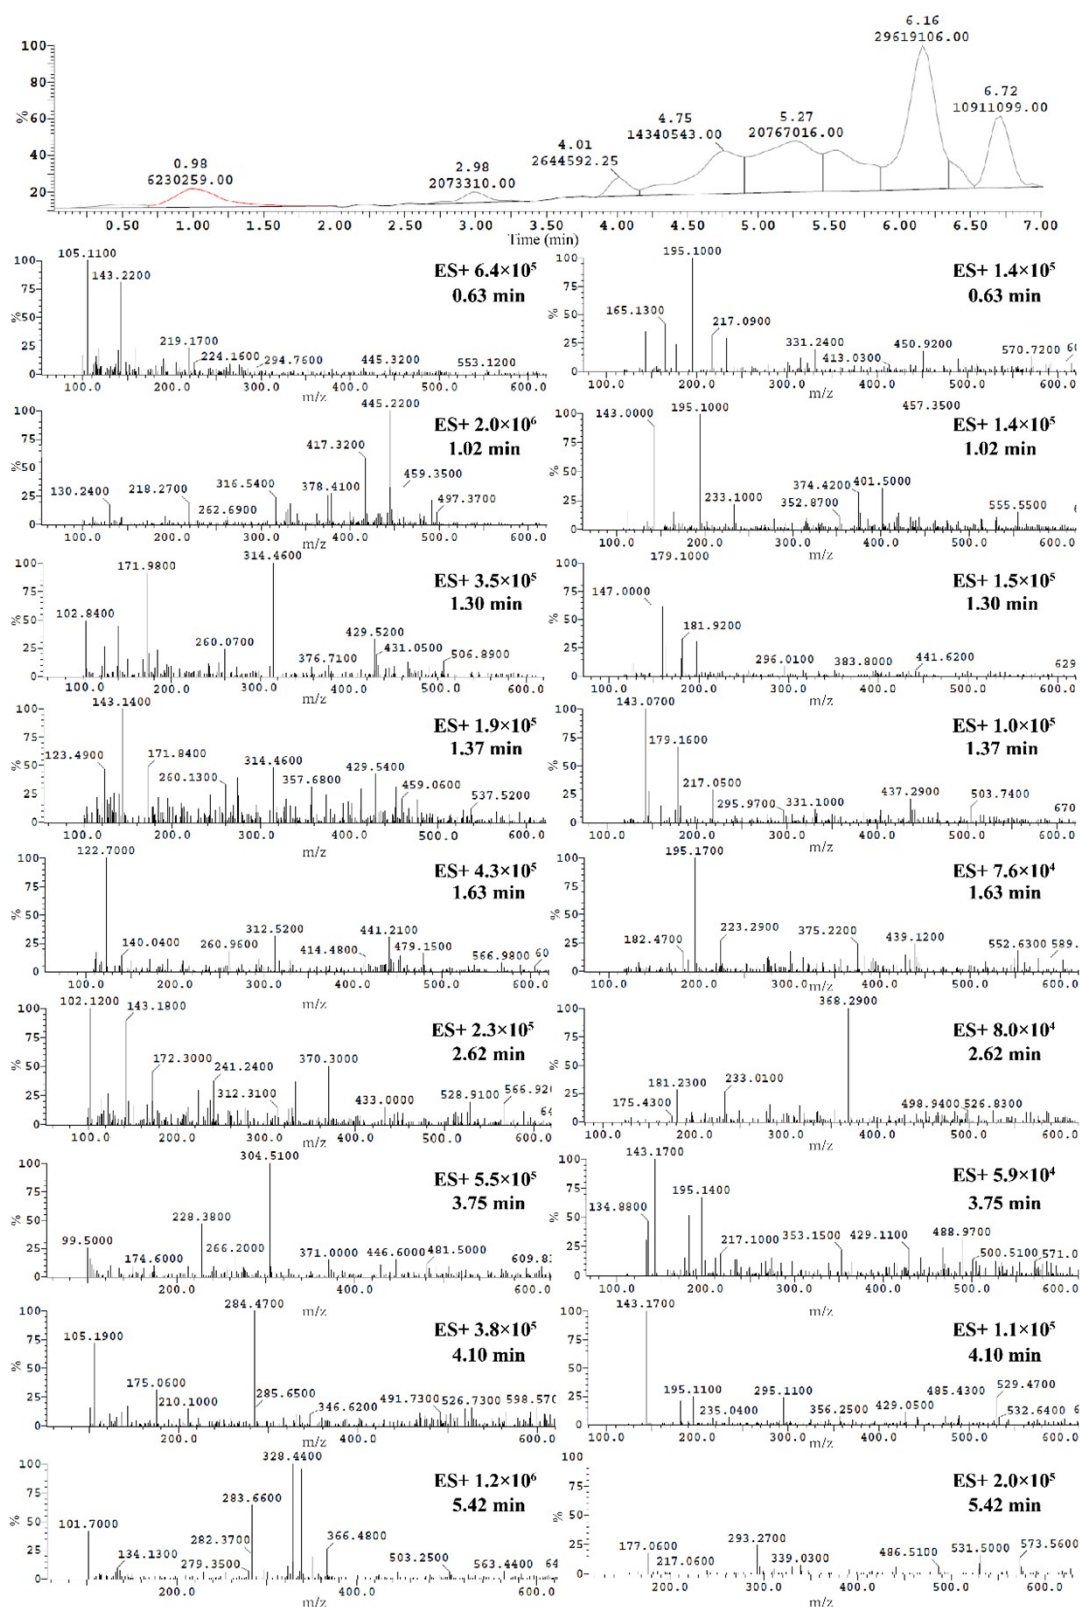

**Fig. S8.** Total HPLC-MS after the TEC photodegradation under sunlight irradiation for 150 min over BWO/CdS-2 and the corresponding intermediates analysis at different retention times of 0.63 min, 1.02 min, 1.30 min, 1.37 min, 1.63 min, 2.62 min, 3.75



min, 4.10 min, and 5.42 min.

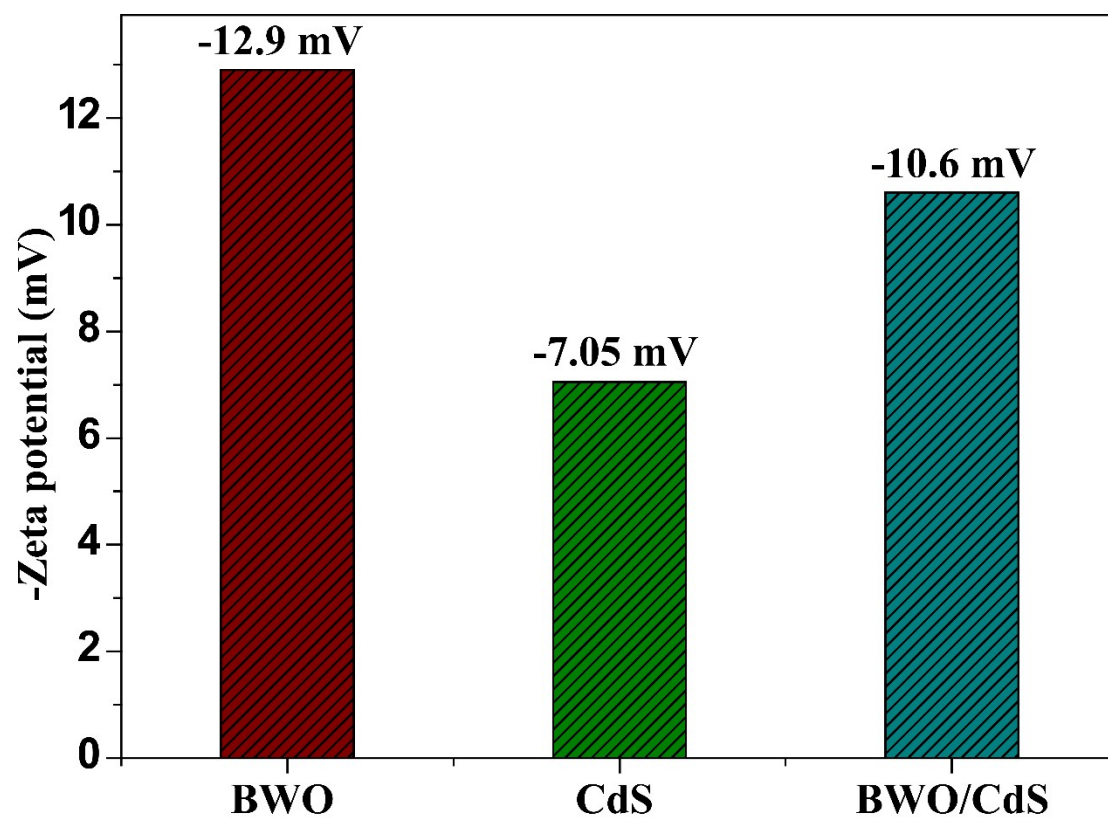

Fig. S9. Zeta potentials of samples in water.

Table S1. The calculated VB, CB and FF values of pristine BWO and CdS.

| Materials    | BWO     | CdS      |
|--------------|---------|----------|
| VB (vs. NHE) | 2.83 eV | 1.76 eV  |
| CB (vs. NHE) | 0.02 eV | -0.47 eV |
| $E_g$        | 2.81 eV | 2.23 eV  |

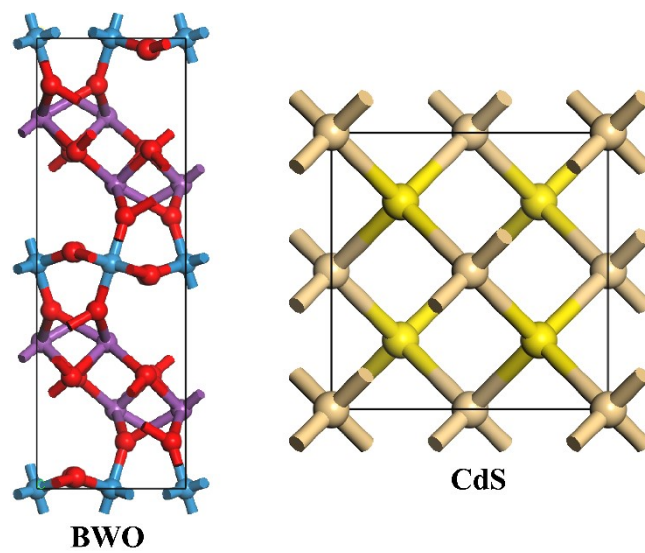

**Fig. S10.** Crystal structures of BWO and CdS for first principles calculations.
